# Supplementary material for: Emerging contaminants in the Mediterranean Sea endangering Lebanon's Palm Islands Natural Reserve
Source: Royal Society of Chemistry journal article supplement (doi:10.1039/d4ra09017a), 2025-01-01
Supplement: d4ra09017a1.pdf [file d4ra09017a1.pdf]

# Emerging Contaminants in The Mediterranean Sea Endangering Lebanon's Palm Islands Natural Reserve

Bilal Nehmeh<sup>1#</sup>, Fatima Haydous<sup>1#</sup>, Hiba Ali<sup>1,2</sup>, Adonis Hdaifi<sup>1</sup>, Bayan Abdlwahab<sup>1</sup>, Mariam Bou Orm<sup>1</sup>,

Zohrab Abrahamian<sup>1,3</sup>, Elias Akoury<sup>1\*</sup>

<sup>1</sup> Department of Physical Sciences, School of Arts and Sciences, Lebanese American University, Beirut 1102-2801, Lebanon

<sup>2</sup> Université Lille Nord de France, USTL, Cite Scientifique, 59652 Villeneuve d'Ascq cedex, France

<sup>3</sup> US-Middle East Partnership Initiative (MEPI) Tomorrow's Leaders Program

# Contributed equally

\* Corresponding author:

Dr. Elias Akoury  
Department of Physical Sciences  
School of Arts and Sciences  
Lebanese American University  
Beirut 1102-2801, Lebanon  
+961 1 786456 ext. 3950  
[elias.akoury@lau.edu.lb](mailto:elias.akoury@lau.edu.lb)

## Supplementary Information

## Supplementary Figures and Tables

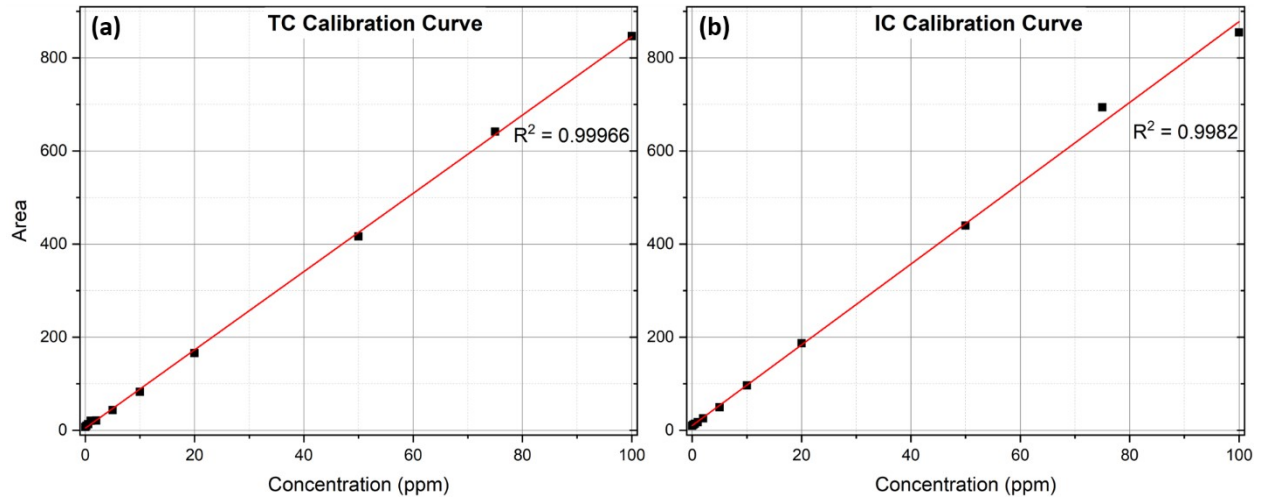

**Supplementary Figure 1.** (a) Total Carbon (TC) and Inorganic Carbon (IC) calibration curves acquired on TOC-VCPN instrument.

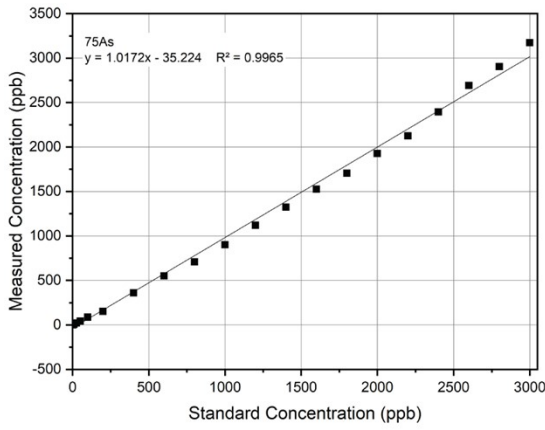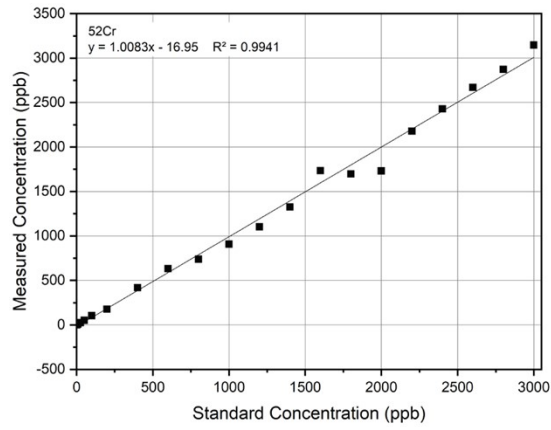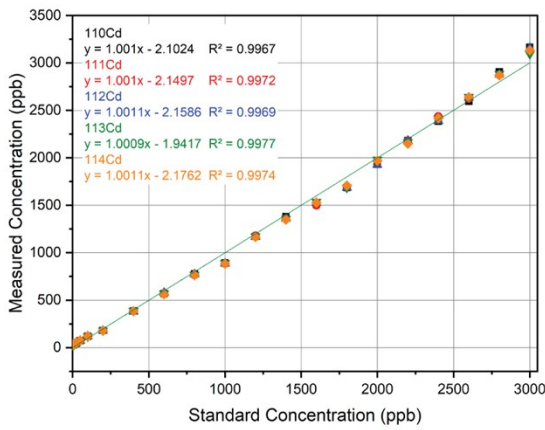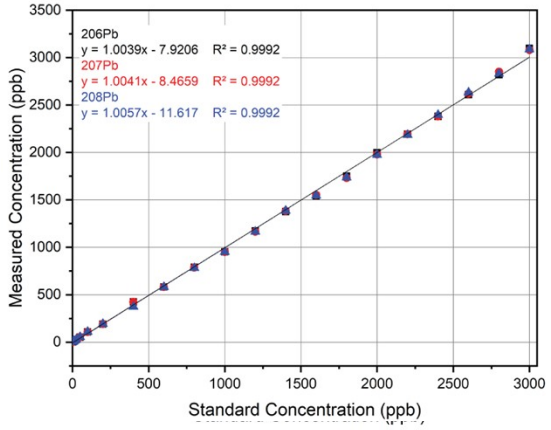

**Supplementary Figure 2.** Calibration curves of the heavy metals As, Cr, Cd, and Pb acquired on ICPMS.

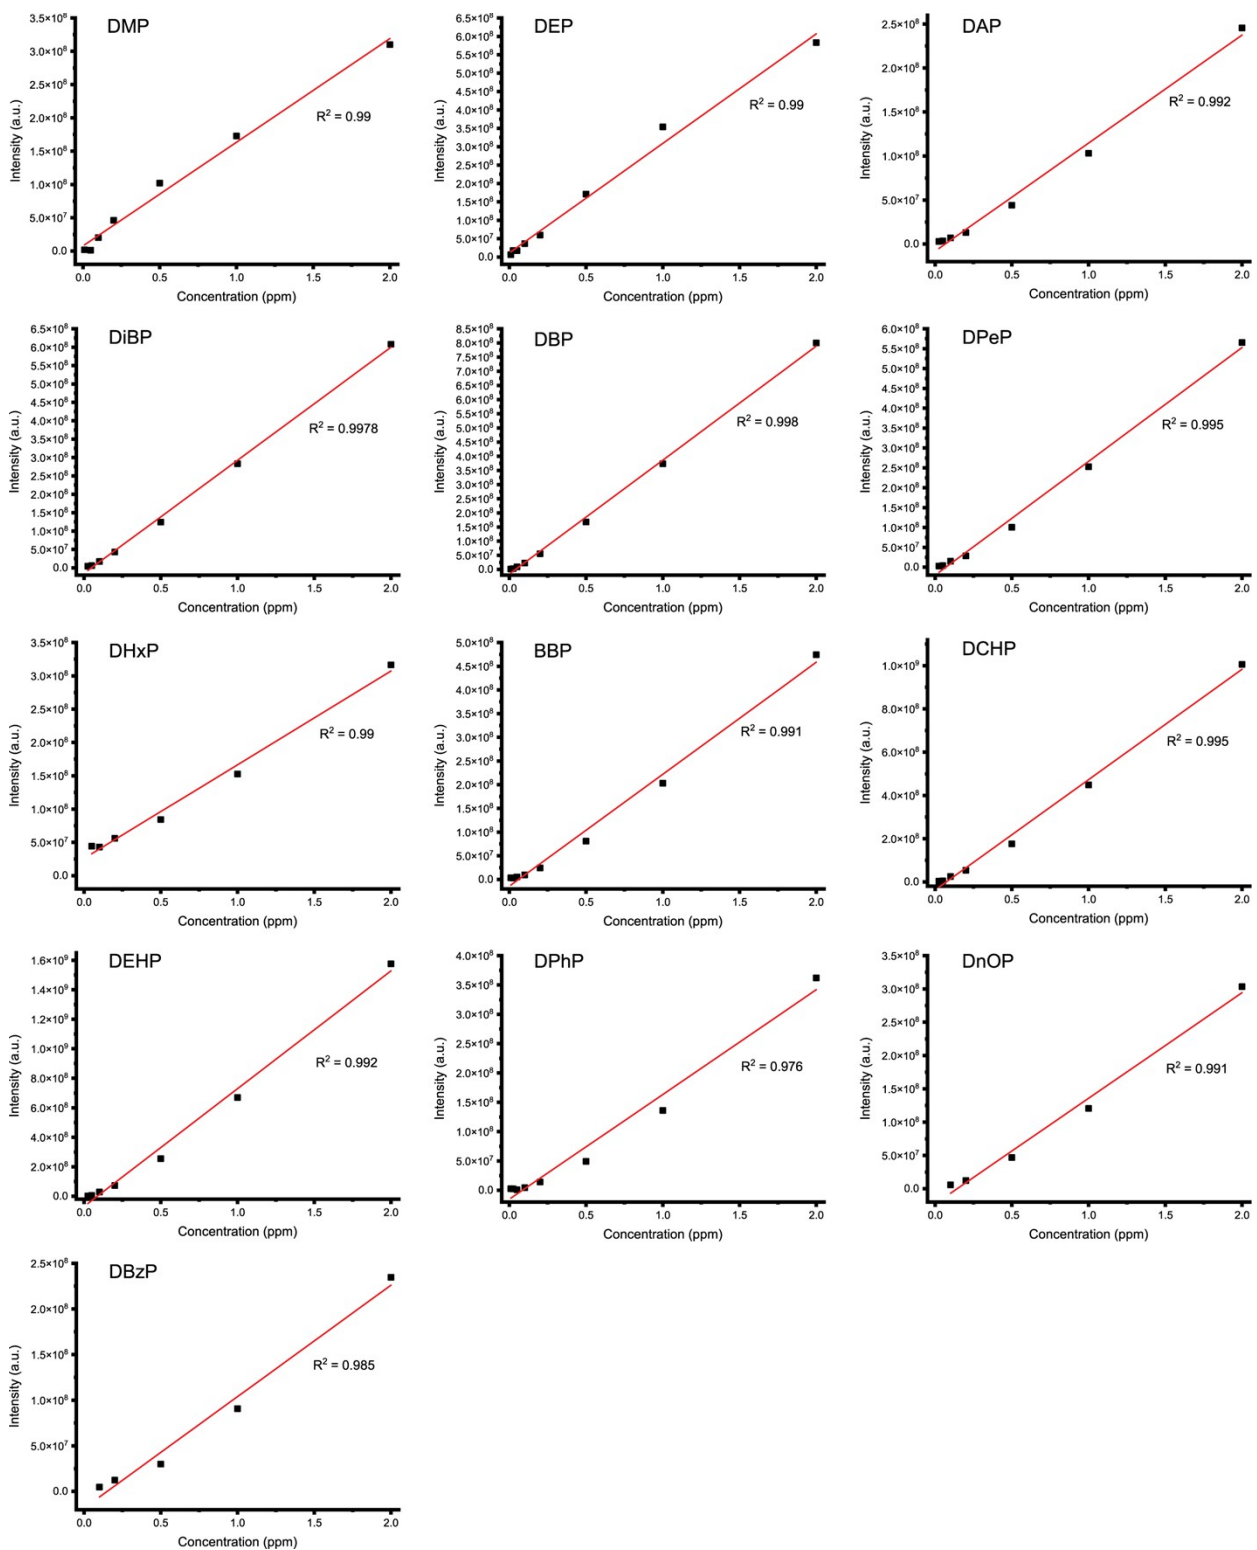

**Supplementary Figure 3.** Calibration curves showing the concentration-dependent variation in the intensity of the chromatogram peaks of the 13 investigated phthalates.

**Supplementary Table 1.** Assessment of the accuracy of the method by the two certified reference materials Seawater ERM-CA403 and Wastewater ERM-CA713 (n = 6).

| Heavy Metal | Seawater Reference Material         |            | Wastewater reference Material       |            |
|-------------|-------------------------------------|------------|-------------------------------------|------------|
|             | Certified value ( $\mu\text{g/L}$ ) | Recovery % | Certified value ( $\mu\text{g/L}$ ) | Recovery % |
| As          | $1.90 \pm 0.13$                     | 111.74     | $10.8 \pm 0.3$                      | 101.31     |
| Cd          | $0.094 \pm 0.011$                   | 104.44     | $5.09 \pm 0.20$                     | 94.43      |
| Cr          | n/a                                 | n/a        | $20.9 \pm 1.3$                      | 88.19      |
| Pb          | $0.098 \pm 0.010$                   | 81.67      | $49.7 \pm 1.7$                      | 116.75     |

**Supplementary Table 2.** The physical-chemical properties of the non-deuterated and deuterated phthalates with the retention times, recoveries, quantifier, and qualifier ions from GC-MS analysis.

| <b>Standards</b>            | <b>Abbreviation</b> | <b>Molar Mass (g/mol)</b> | <b>Retention Time (min)</b> | <b>Quantifier Ion (m/z)</b> | <b>Qualifier Ion (m/z)</b> |
|-----------------------------|---------------------|---------------------------|-----------------------------|-----------------------------|----------------------------|
| Dimethyl phthalate          | DMP                 | 194.18                    | 12.35                       | 163.04                      | 194, 135, 77               |
| Diethyl phthalate           | DEP                 | 222.24                    | 14.51                       | 149.04                      | 222, 121                   |
| Diallyl phthalate           | DAP                 | 246.31                    | 17.25                       | 149.05                      | 97                         |
| Di-iso-butyl phthalate      | DiBP                | 278.34                    | 19.31                       | 149.04                      | 223, 205                   |
| Di-n-butyl phthalate        | DBP                 | 278.35                    | 20.62                       | 149.02                      | 223, 205                   |
| Di-n-pentyl phthalate       | DPeP                | 306.41                    | 22.85                       | 149.04                      | 251                        |
| Di-n-hexyl phthalate        | DHxP                | 334.41                    | 24.25                       | 149.03                      | 185                        |
| Butylbenzyl phthalate       | BBP                 | 312.37                    | 25.62                       | 149.05                      | 238, 206                   |
| Dicyclohexyl phthalate      | DCHP                | 330.42                    | 27.62                       | 149.05                      | 167                        |
| Bis(2-ethylhexyl) phthalate | DEHP                | 390.56                    | 27.81                       | 149.04                      | 279, 167                   |
| Diphenyl phthalate          | DPhP                | 318.32                    | 27.93                       | 225.06                      | 132                        |
| Di-n-octyl phthalate        | DnOP                | 390.62                    | 29.84                       | 149.05                      | 279                        |
| Dibenzyl phthalate          | DBzP                | 346.44                    | 30.15                       | 107.03                      | 221                        |
